# Supplementary material for: Theoretical study of p-block metal–nitrogen–carbon single-atom catalysts for the oxygen reduction reaction
Source: Royal Society of Chemistry journal article supplement (doi:10.1039/d2cy01176j), 2022-01-01
Supplement: d2cy01176j1.pdf [file d2cy01176j1.pdf]

## Supporting Information for Theoretical study of p-block metal-nitrogen-carbon single-atom catalysts for oxygen reduction reaction

Hao Hu,<sup>a</sup> Peng Zhang,<sup>\*,b</sup> Bei-Bei Xiao,<sup>c</sup> and Jian-Li Mi<sup>\*,a</sup>

<sup>a</sup> *Institute for Advanced Materials, School of Materials Science and Engineering, Jiangsu University, Zhenjiang 212013, China. Email: [jlmi@ujs.edu.cn](mailto:jlmi@ujs.edu.cn) (J.-L. Mi)*

<sup>b</sup> *Key Laboratory for Water Quality and Conservation of the Pearl River Delta, Ministry of Education, Institute of Environmental Research at Greater Bay, Guangzhou University, Guangzhou 510006, China. Email: [pengzhang85@foxmail.com](mailto:pengzhang85@foxmail.com) (P. Zhang).*

<sup>c</sup> *School of Energy and Power Engineering, Jiangsu University of Science and Technology, Zhenjiang 212003, China.*

### Calculation methods

The Gibbs free energy diagrams of ORR on PM-N<sub>4</sub> are calculated using the reversible hydrogen electrode (RHE) model developed by Nørskov et al.<sup>1</sup> Taken RHE as the reference electrode, the chemical potential ( $\mu$ ) of proton-electron pair is equal to that of half a hydrogen molecule:

$$\mu_{\text{H}^+} + \mu_{\text{e}^-} = \frac{1}{2}\mu_{\text{H}_2}$$

at conditions with  $U = 0$  V and  $P_{\text{H}_2} = 1$  bar.

The free energies ( $G$ ) of each species are calculated as:

$$G = E_{\text{DFT}} + E_{\text{ZPE}} - TS$$

where the  $E_{\text{DFT}}$  is the DFT calculated total energy,  $E_{\text{ZPE}}$  is zero-point energy and  $S$  is the entropy at 298 K. Since the exact free energy of OOH, O, OH radicals in the electrolyte

solution is difficult to obtain, the adsorption free energy  $\Delta G_{\text{OOH}^*}$ ,  $\Delta G_{\text{O}^*}$  and  $\Delta G_{\text{OH}^*}$  are relative to the free energy of stoichiometrically appropriate amounts of  $\text{H}_2\text{O}$  (*l*) and  $\text{H}_2$  (*g*), defined as follows:

$$\begin{aligned}
\Delta G_{\text{OOH}^*} &= G_{\text{OOH}^*} - G^* - (2G_{\text{H}_2\text{O}} - \frac{3}{2}G_{\text{H}_2}) \\
&= (E_{\text{OOH}^*} - E^* - 2E_{\text{H}_2\text{O}} + \frac{3}{2}E_{\text{H}_2}) \\
&\quad + (E_{\text{ZPE}}(\text{OOH}^*) - E_{\text{ZPE}}(^*) - 2E_{\text{ZPE}}(\text{H}_2\text{O}) + \frac{3}{2}E_{\text{ZPE}}(\text{H}_2)) \\
&\quad - T \times (S_{\text{OOH}^*} - S^* - 2S_{\text{H}_2\text{O}} + \frac{3}{2}S_{\text{H}_2}) \\
\Delta G_{\text{O}^*} &= G_{\text{O}^*} - G^* - (G_{\text{H}_2\text{O}} - G_{\text{H}_2}) \\
&= (E_{\text{O}^*} - E^* - E_{\text{H}_2\text{O}} + E_{\text{H}_2}) \\
&\quad + (E_{\text{ZPE}}(\text{O}^*) - E_{\text{ZPE}}(^*) - E_{\text{ZPE}}(\text{H}_2\text{O}) + E_{\text{ZPE}}(\text{H}_2)) \\
&\quad - T \times (S_{\text{OOH}^*} - S^* - S_{\text{H}_2\text{O}} + S_{\text{H}_2}) \\
\Delta G_{\text{OH}^*} &= G_{\text{OH}^*} - G^* - (G_{\text{H}_2\text{O}} - \frac{1}{2}G_{\text{H}_2}) \\
&= (E_{\text{OH}^*} - E^* - E_{\text{H}_2\text{O}} + \frac{1}{2}E_{\text{H}_2}) \\
&\quad + (E_{\text{ZPE}}(\text{O}^*) - E_{\text{ZPE}}(^*) - E_{\text{ZPE}}(\text{H}_2\text{O}) + \frac{1}{2}E_{\text{ZPE}}(\text{H}_2)) \\
&\quad - T \times (S_{\text{OOH}^*} - S^* - S_{\text{H}_2\text{O}} + \frac{1}{2}S_{\text{H}_2})
\end{aligned}$$

The reaction free energy ( $\Delta G$ ) of the elementary steps in ORR was calculated as:

$$\Delta G = \Delta E_{\text{DFT}} + \Delta E_{\text{ZPE}} - T\Delta S + \Delta G_{\text{U}} + \Delta G_{\text{pH}}$$

where  $\Delta E_{\text{DFT}}$  is the difference of total energy,  $\Delta E_{\text{ZPE}}$  and  $\Delta S$  are the differences in the zero-point energy and the change of entropy,  $T$  is 298.15 K,  $\Delta G_{\text{U}} = -eU$  and  $\Delta G_{\text{pH}} = \text{pH} \times \kappa_{\text{B}} T \ln 10$  are the contributions from the electrode potential ( $U$ ) and pH value ( $\kappa_{\text{B}}$  is the Boltzmann constant), respectively.<sup>2,3</sup> Since  $\text{O}_2$  in the triplet ground state is notoriously poorly described by DFT computations, the free energy of  $\text{O}_2$  was derived as:

$$G_{\text{O}_2(\text{g})} = 2G_{\text{H}_2\text{O}(\text{l})} - 2G_{\text{H}_2(\text{g})} - 4.92 \text{ eV}$$

The reaction free energy of (1)-(4) for ORR (at  $U = 0$  V vs. RHE) can be calculated using the following equations:

$$\Delta G_1 = \Delta G_{\text{OOH}^*} - 4.92 \text{ eV}$$

$$\Delta G_2 = \Delta G_{\text{O}^*} - \Delta G_{\text{OOH}^*}$$

$$\Delta G_3 = \Delta G_{\text{OH}^*} - \Delta G_{\text{O}^*}$$

$$\Delta G_4 = -\Delta G_{\text{OH}^*}$$

The theoretical overpotential  $\eta$  was adopted to determine the ORR activity of PM-N<sub>4</sub> moieties, which was obtained based on the reaction free energies of the four elemental steps as:

$$\eta = \max\{\Delta G_1, \Delta G_2, \Delta G_3, \Delta G_4\}/e + 1.23 \text{ V}$$

The conductor-like screening model (COSMO) was used to simulate the aqueous environment, and the dielectric constant was set to 78.54.<sup>4</sup>

To evaluate the bonding strength between the PM and the substrate, the binding energy  $E_b$  is calculated as:

$$E_b = E_{\text{PM-N}_4} - E_{\text{N}_4} - E_{\text{PM}}$$

where  $E_{\text{N}_4}$  and  $E_{\text{PM}}$  is the energy of N<sub>4</sub>-doped graphene nanosheet (double carbon vacancies) and isolated one PM atom calculated by DFT, respectively. Also, to compare the bonding strength of PM in PM-N<sub>4</sub> moiety and in bulk metal, the cohesive energies in bulk metal ( $E_{\text{coh}}$ ) are also calculated:

$$E_{\text{coh}} = \mu_{\text{PM (bulk)}} - E_{\text{PM}}$$

where  $\mu_{\text{PM (bulk)}}$  is the calculated chemical potential of PM atom from the most stable bulk crystal by DFT.

## Microkinetic model for polarization curve simulation

Inspired by the previous study of Nørskov et al.,<sup>5</sup> a microkinetic model has been constructed to simulate the ORR polarization curves of PM-N-C using CatMAP code developed by Nørskov's group.<sup>6</sup> The O<sub>2</sub> molecule diffusion, adsorption and electrochemical reduction steps are listed by the following equations:

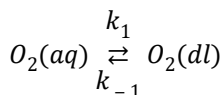

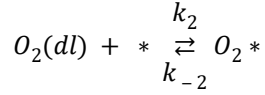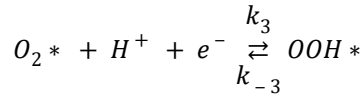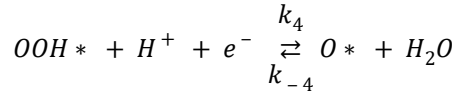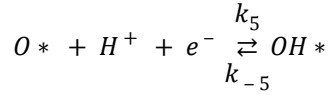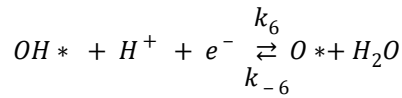

### **Rate equations**

Based on the above reaction steps, the rate equations of each species are accordingly given below:

$$\frac{\partial x_{O_2(dl)}}{\partial t} = k_1 x_{O_2(aq)} - k_{-1} x_{O_2(dl)} - k_2 x_{O_2(dl)} \theta^* + k_{-2} \theta_{O_2^*}$$

$$\frac{\partial \theta_{O_2^*}}{\partial t} = k_2 x_{O_2(dl)} \theta^* - k_{-2} \theta_{O_2^*} - k_3 \theta_{O_2^*} + k_{-3} x_{H_2O} \theta_{OOH^*}$$

$$\frac{\partial \theta_{OOH^*}}{\partial t} = k_3 \theta_{O_2^*} - k_{-3} \theta_{OOH^*} - k_4 \theta_{OOH^*} + k_{-4} \theta_{O^*}$$

$$\frac{\partial \theta_{O^*}}{\partial t} = k_4 \theta_{OOH^*} - k_{-4} \theta_{O^*} - k_5 \theta_{O^*} + k_{-5} \theta_{OH^*}$$

$$\frac{\partial \theta_{OH^*}}{\partial t} = k_5 \theta_{O^*} - k_{-5} \theta_{OH^*} - k_6 \theta_{OH^*} + k_{-6} \theta^* x_{H_2O}$$

where  $x$  is mole fraction,  $\theta$  is coverage of the species on one PM site, and  $t$  is time.  $x_{H_2O}$  is taken as 1, and  $x_{O_2(aq)}$  is taken as  $2.34 \times 10^{-5}$ , representing to  $O_2(g)$  in equilibrium with  $O_2(aq)$  at 1 atm. These coverages of the species on one PM site should be satisfied the following condition:  $\theta^* + \theta_{O_2^*} + \theta_{OOH^*} + \theta_{O^*} + \theta_{OH^*} = 1$ .

Following the transition state theory, the equilibrium constant ( $K_i$ ) and the rate constant ( $k_i$ ) of the non-electrochemical step  $i$  are given by:

$$K_i = \exp\left(-\frac{\Delta G_i}{k_B T}\right)$$

$$k_i = \nu_i \exp\left(-\frac{E_{a,i}}{k_B T}\right)$$

where  $\Delta G_i$ ,  $\nu_i$ , and  $E_{a,i}$  are the free energy change, pre-exponential factor, and activation energy of step  $i$ , respectively. Moreover,  $k_B$  is Boltzmann constant, and  $T$  is temperature (298.15 K). The values of  $\nu_i$  are taken from ref 5.

For the electrochemical step,  $K_i$  and  $k_i$  are associated with the reaction potential ( $U$  vs. RHE) and given by:

$$K_i = \exp\left(-\frac{e(U - U_i)}{k_B T}\right)$$

$$k_i = A_i \exp\left(-\frac{E_{a,i}}{k_B T}\right) \exp\left(-\frac{e\beta(U - U_i)}{k_B T}\right)$$

where  $U_i$  is the reversible potential of step  $i$  deduced by  $U_i = -\Delta G_i/e$ ,  $A_i$  is the effective pre-exponential factor taken as  $1.23 \times 10^9$ , and  $\beta$  is the symmetric factor taken as 0.5. Since the  $E_{a,i}$  values of electrochemical ORR steps are generally small, ranging from 0.10 to 0.26 eV,<sup>7,8</sup>  $E_{a,i} = 0.26$  eV is adopted for all the electrochemical steps of the ORR on PM-N-C sites.

Moreover, the rate constants for all the reverse reactions ( $k_{-i}$ ), can be deduced by:

$$k_{-i} = \frac{k_i}{K_i}$$

### **Current density**

The current density ( $j$ ) can be deduced by:

$$j = e\rho TOF_e -$$

where  $e$  is the elementary charge and  $\rho$  is the surface density of active sites of PM-N-C SACs, which is assumed to be comparable with that of Pt(111), and  $^{TOF}_{e^-}$  is the turn over frequency of electrons.

## Figures

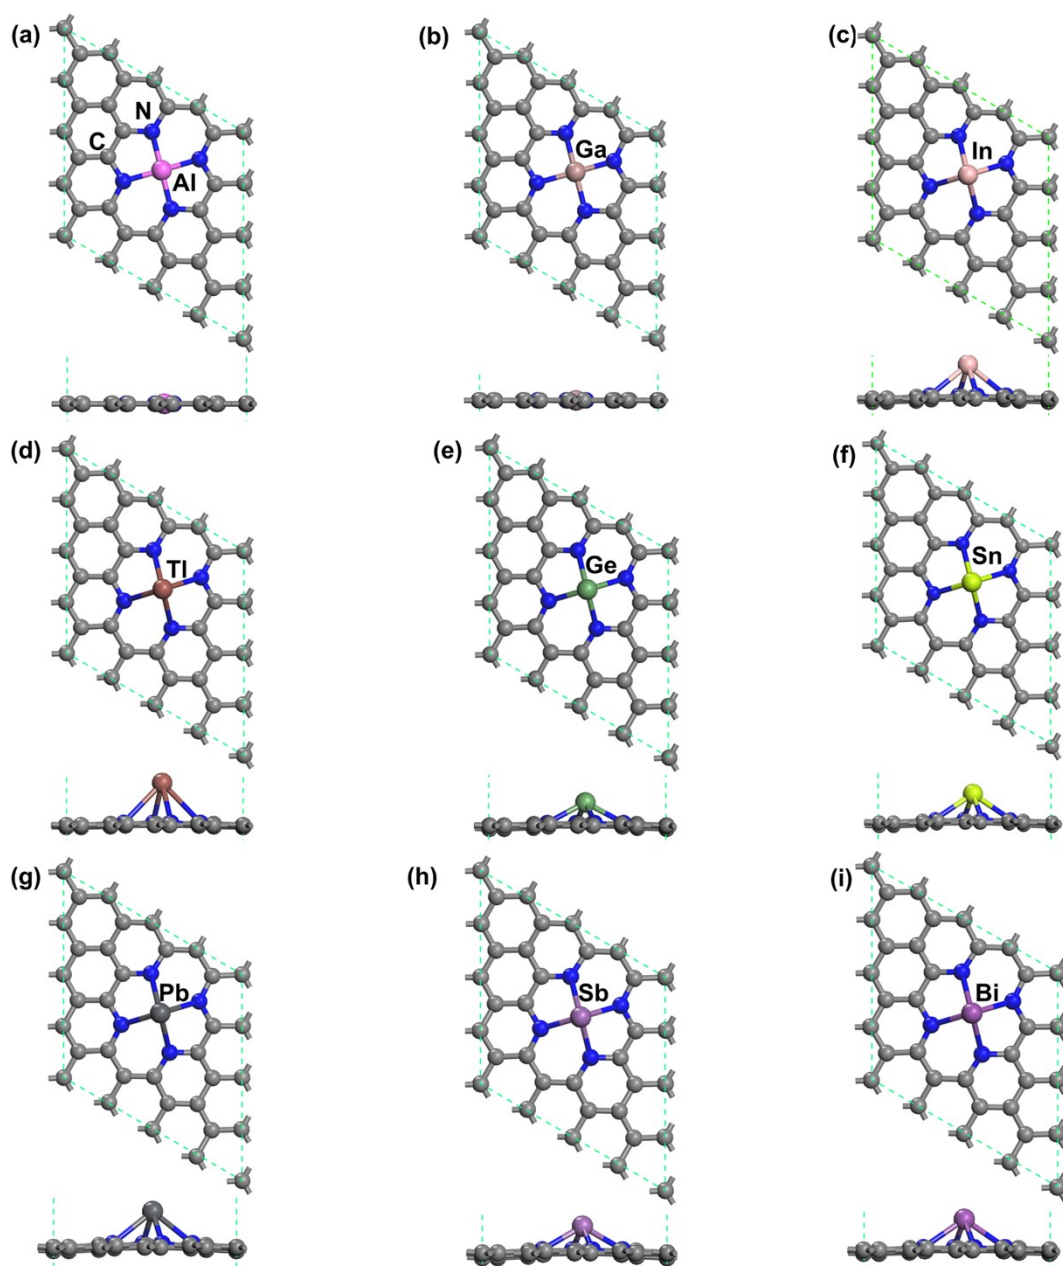

**Fig. S1.** Optimized 9 geometric configurations of PM-N<sub>4</sub> embedded graphene, containing top view and side view.

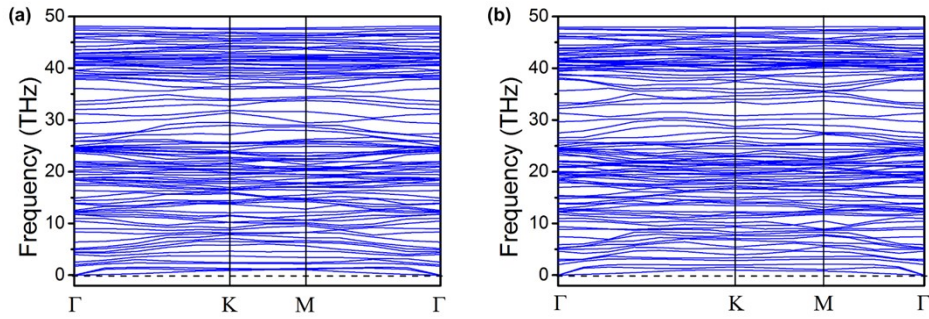

**Fig. S2.** Phonon dispersion spectra of (a) Tl-N<sub>4</sub> and (b) Pb-N<sub>4</sub>.

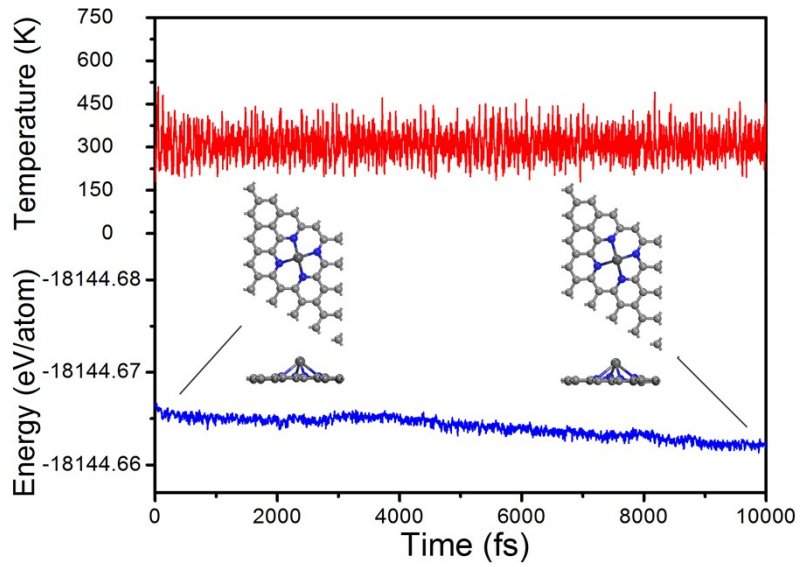

**Fig. S3.** Evolution of the total energy per atom and the temperature within 10000 fs AIMD simulation at 300 K for Pb-N<sub>4</sub>. The inset diagrams show the atomic structure at start and end of the AIMD simulation.

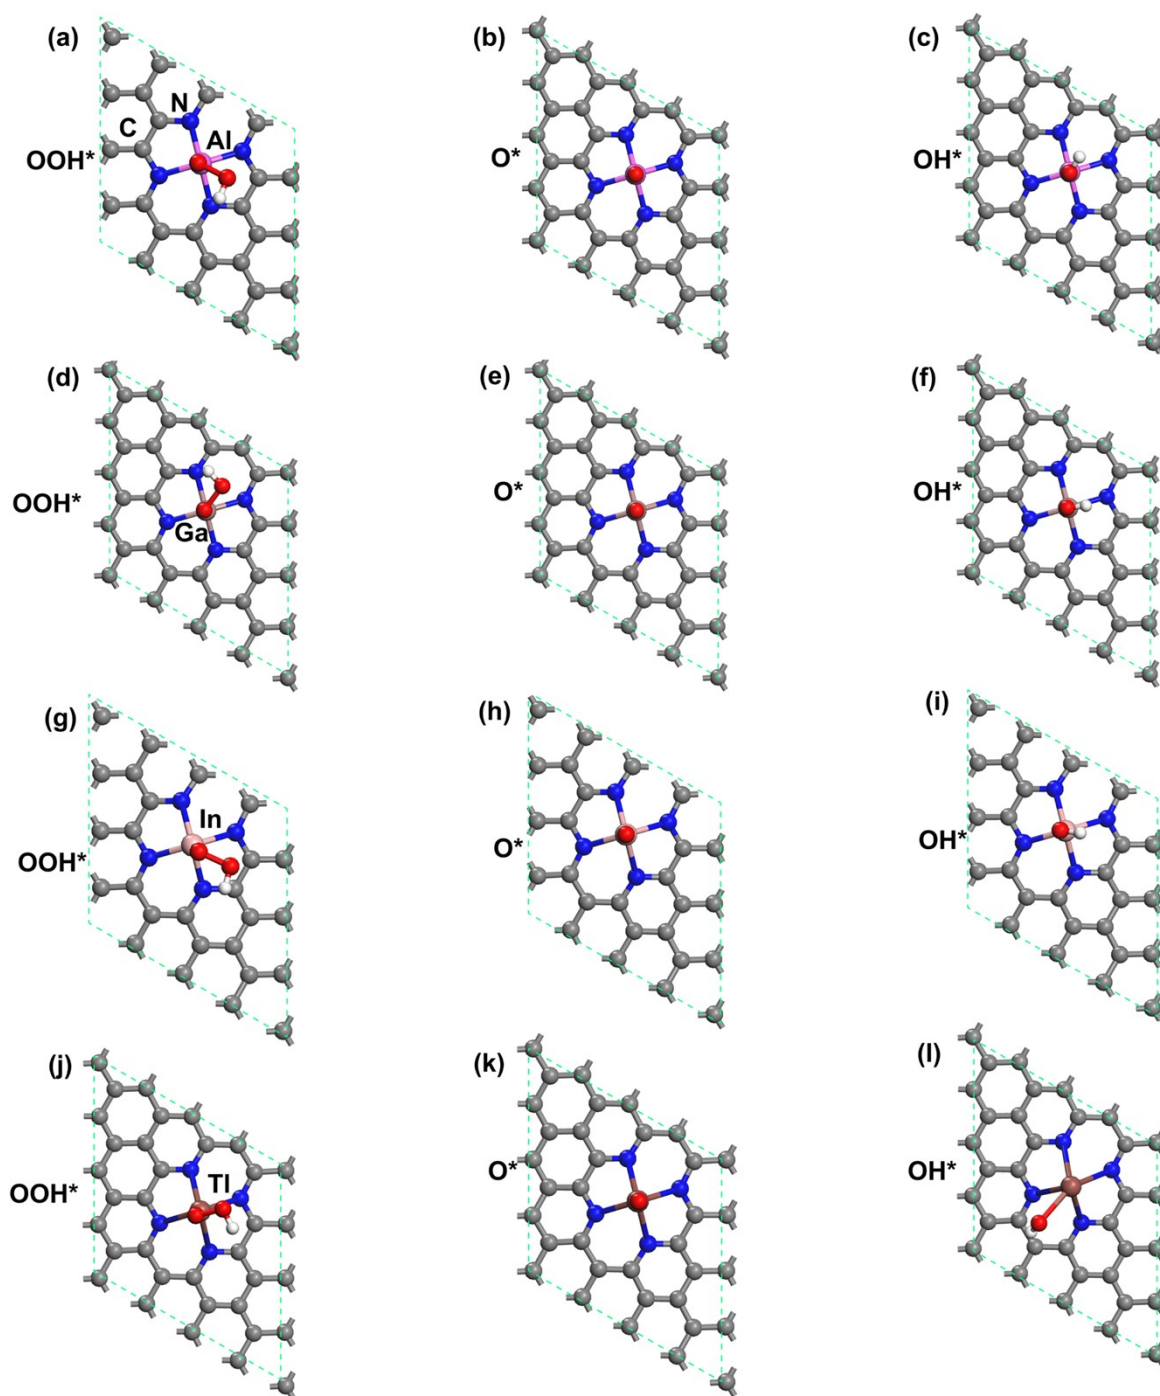

**Fig. S4.** Optimized adsorption structures of OOH\*, O\* and OH\* on Al-N<sub>4</sub>, Ga-N<sub>4</sub>, In-N<sub>4</sub> and Tl-N<sub>4</sub> sites (Grey, blue, red and white spheres represent C, N, O and H atoms, respectively).



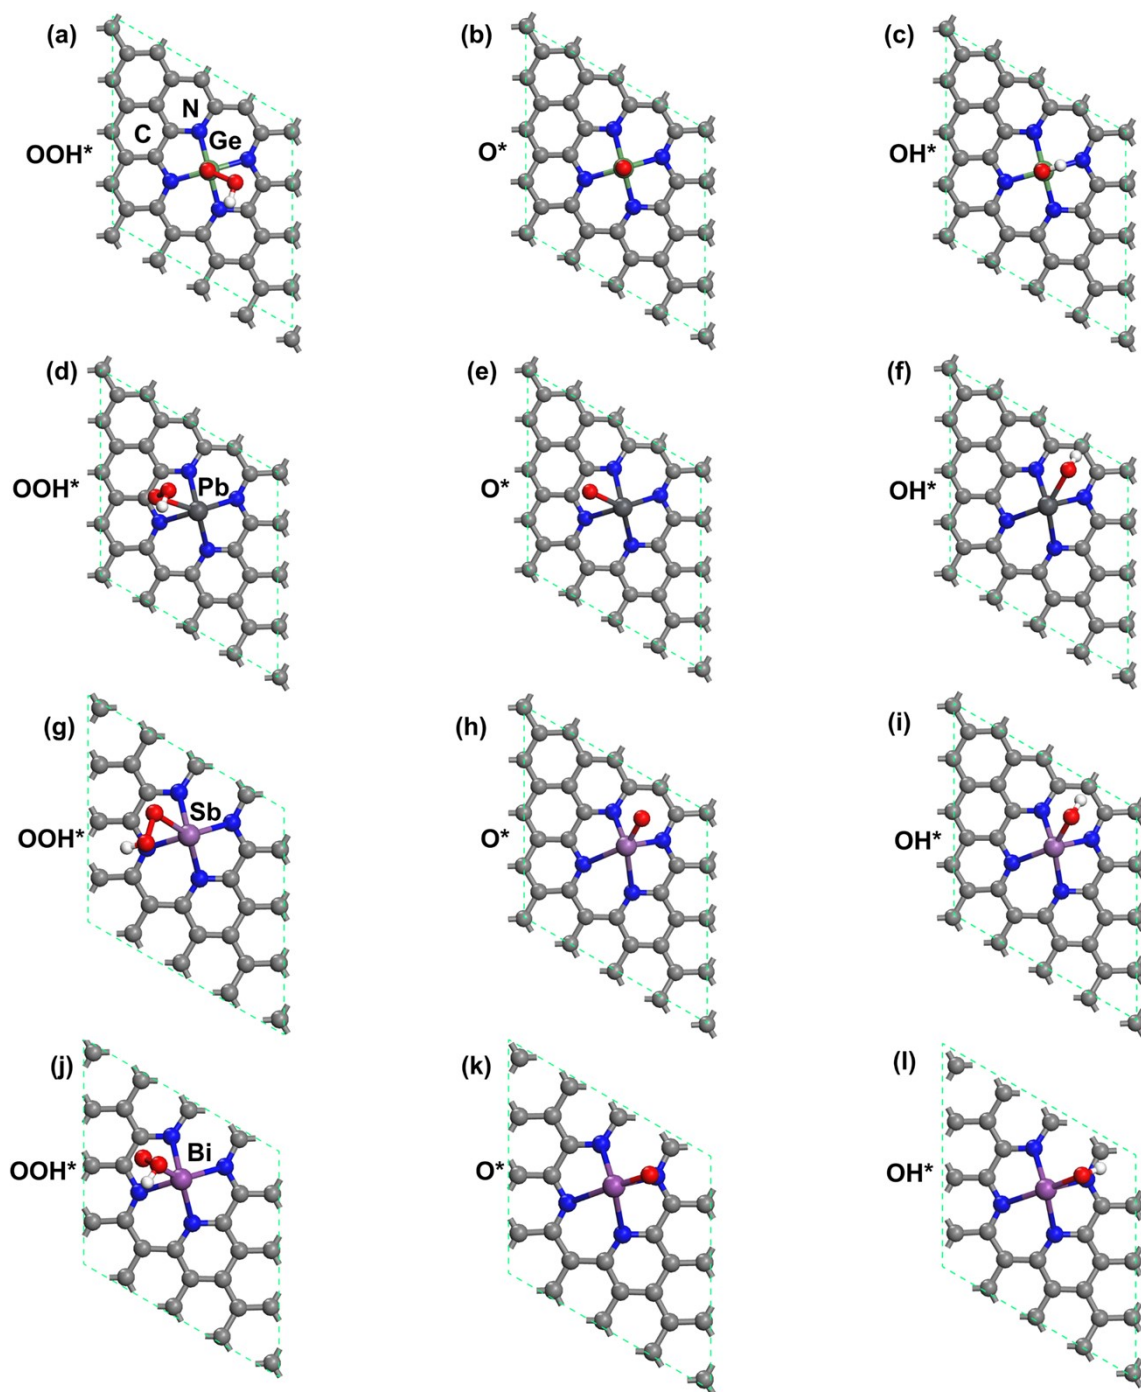

**Fig. S5.** Optimized adsorption structures of OOH\*, O\* and OH\* on Ge-N<sub>4</sub>, Pb-N<sub>4</sub>, Sb-N<sub>4</sub> and Bi-N<sub>4</sub> sites (Grey, blue, red and white spheres represent C, N, O and H atoms, respectively).

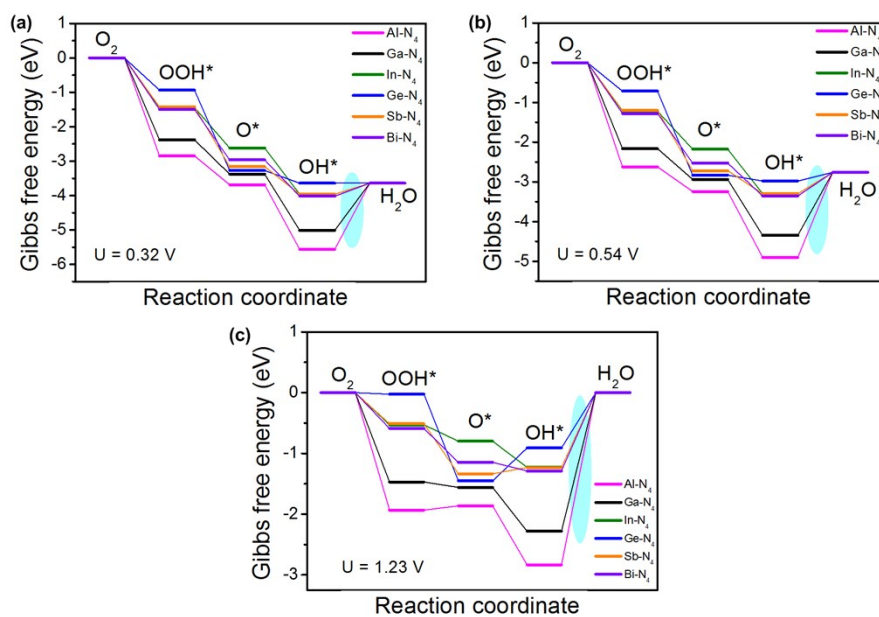

**Fig. S6.** Reaction free energy profiles of the ORR on PM (Al, Ga, In, Ge, Sb and Bi)-N<sub>4</sub> sites at different potentials.

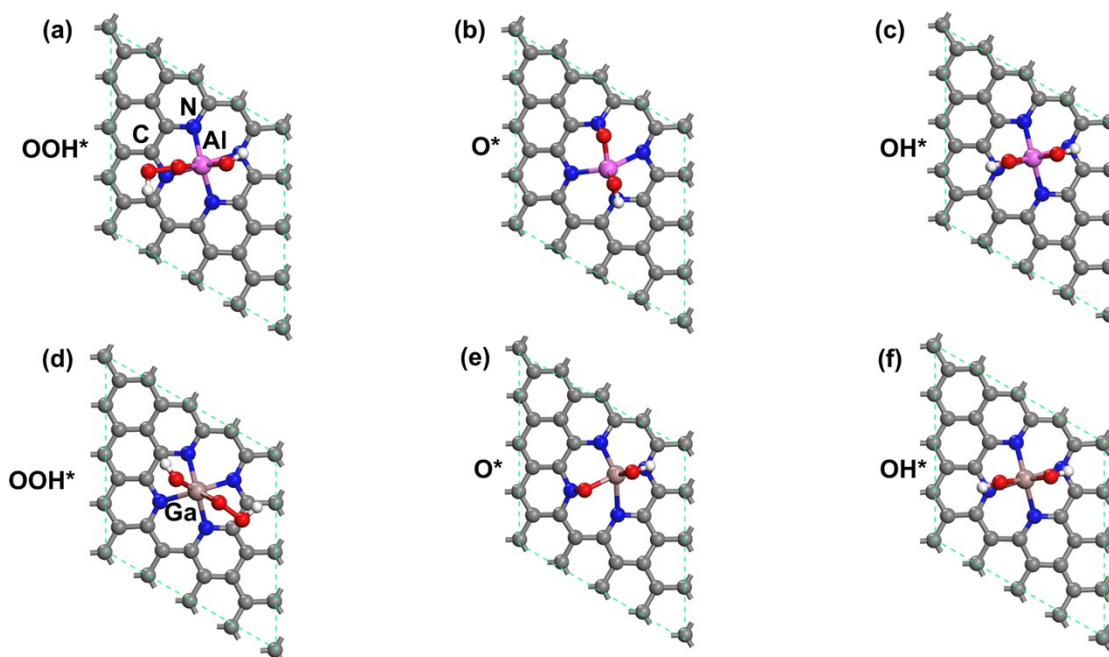

**Fig. S7.** Optimized adsorption structures of OOH\*, O\* and OH\* on Al-N<sub>4</sub>-OH\* and Ga-N<sub>4</sub>-OH\* (Grey, blue, red and white spheres represent C, N, O and H atoms, respectively).

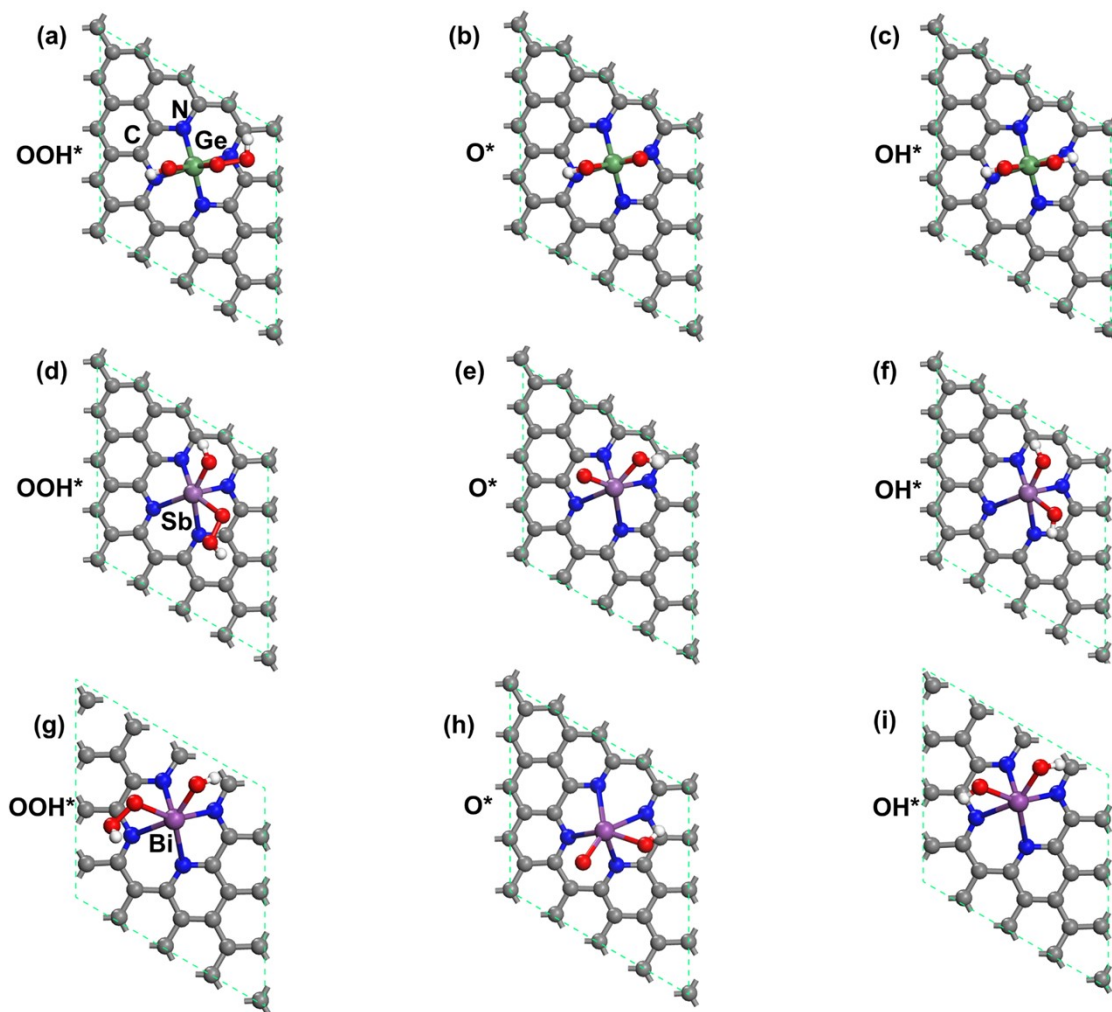

**Fig. S8.** Optimized adsorption structures of OOH\*, O\* and OH\* on Ge-N<sub>4</sub>-OH\*, Sb-N<sub>4</sub>-OH\* and Bi-N<sub>4</sub>-OH\* (Grey, blue, red and white spheres represent C, N, O and H atoms, respectively).

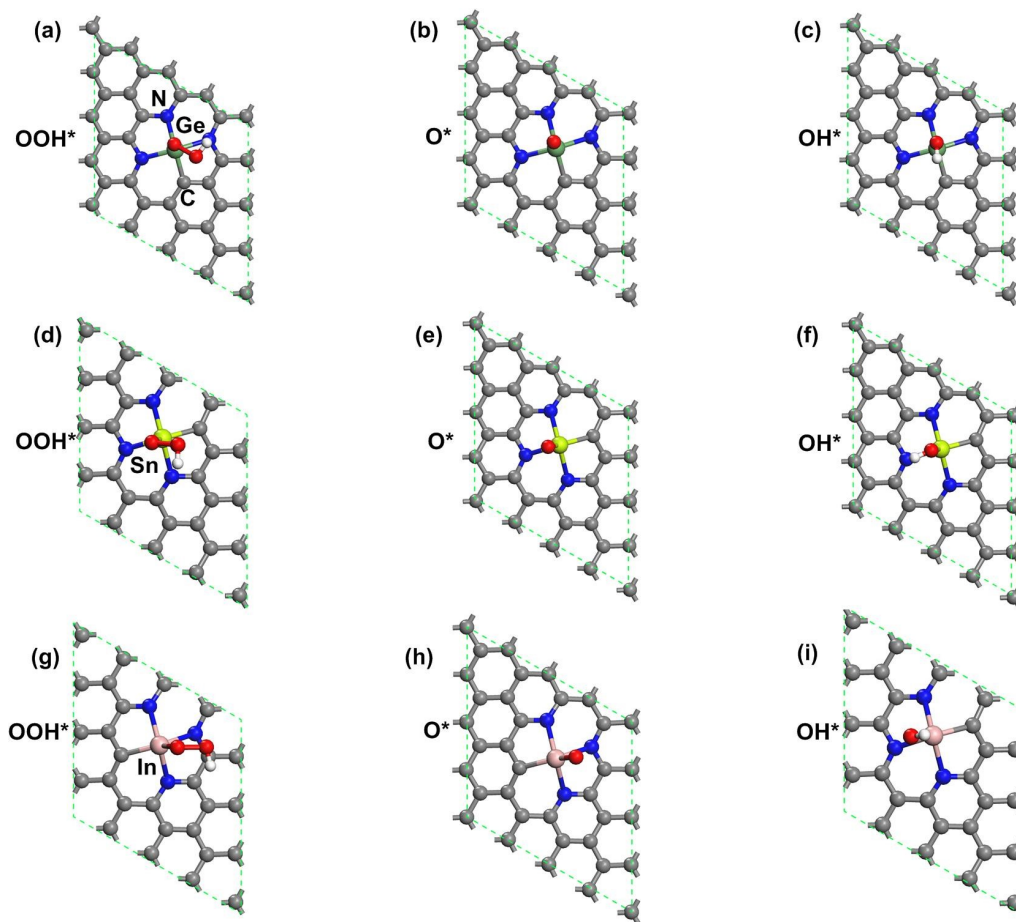

**Fig. S9.** Optimized adsorption structures of  $\text{OOH}^*$ ,  $\text{O}^*$  and  $\text{OH}^*$  on  $\text{Ge-N}_3\text{C}$ ,  $\text{Sn-N}_3\text{C}$  and  $\text{In-N}_3\text{C}$  (Grey, blue, red and white spheres represent C, N, O and H atoms, respectively).

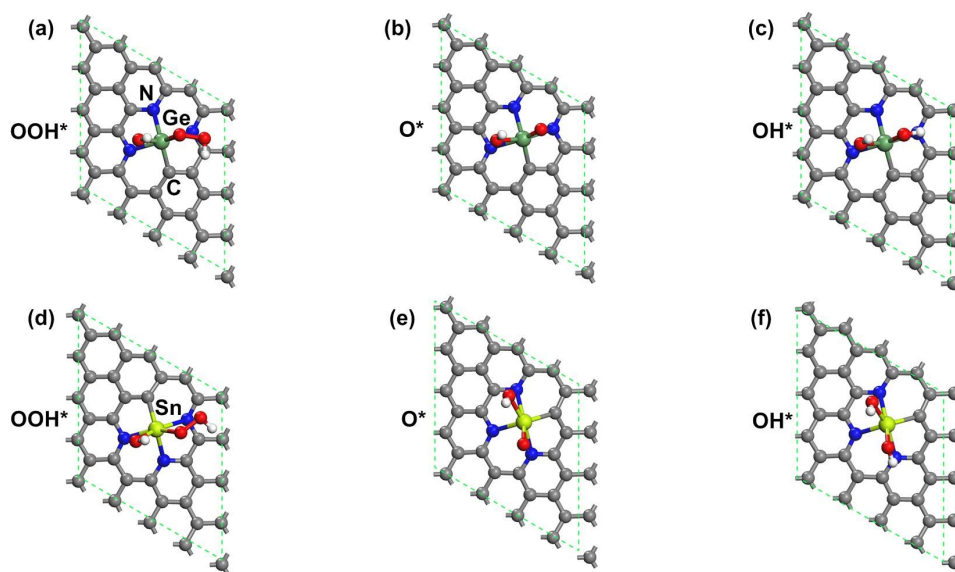

**Fig. S10.** Optimized adsorption structures of OOH\*, O\* and OH\* on Ge-N<sub>3</sub>C-OH\* and Sn-N<sub>3</sub>C-OH\* (Grey, blue, red and white spheres represent C, N, O and H atoms, respectively).

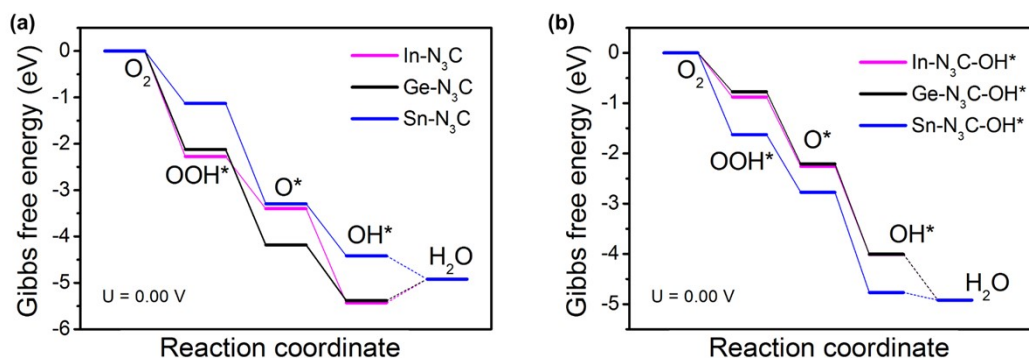

**Fig. S11.** Reaction free energy profiles of the ORR on the three (a) PM-N<sub>3</sub>-C and (b) PM-N<sub>3</sub>-C-OH\* sites at U = 0 V vs. RHE.

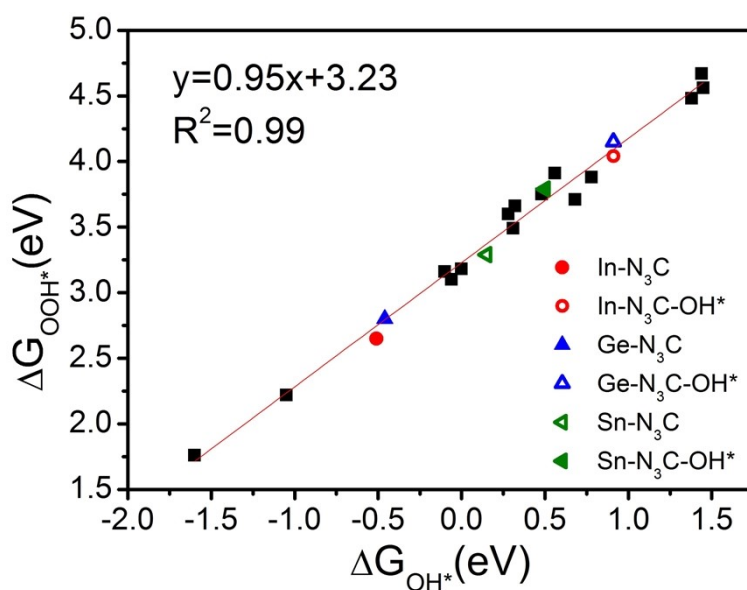

**Fig. S12.** The linear relationship between  $\Delta G_{\text{OOH}^*}$  and  $\Delta G_{\text{OH}^*}$  on typical pristine and OH\* self-modified PM-N<sub>3</sub>-C sites (black dots represent pristine and OH\* self-modified PM-N<sub>4</sub> sites). The linear relationship between  $\Delta G_{\text{OOH}^*}$  and  $\Delta G_{\text{OH}^*}$  for typical PM-N<sub>3</sub>-C and PM-N<sub>3</sub>-C-OH\* sites is consistent with that for PM-N<sub>4</sub> and PM-N<sub>4</sub>-OH\* sites.

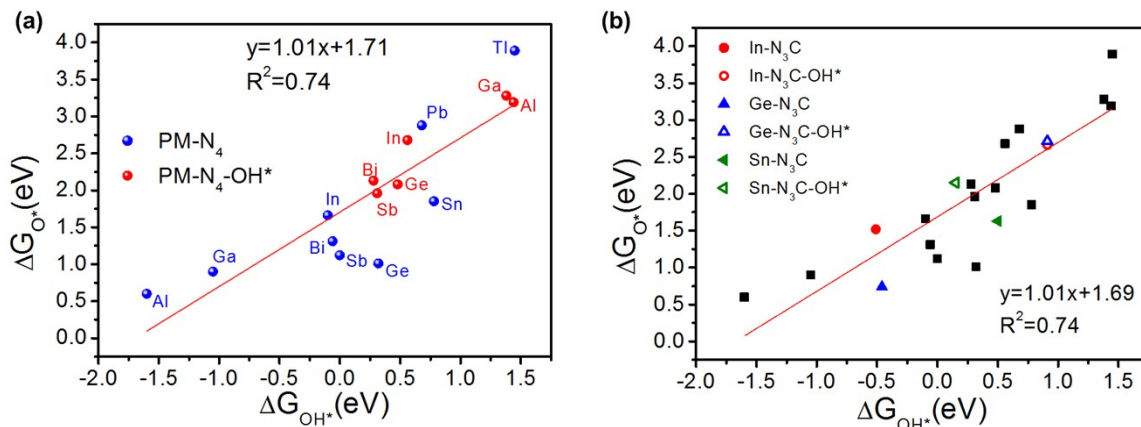

**Fig. S13.** (a) The linear relationship between  $\Delta G_{O^*}$  and  $\Delta G_{OH^*}$  for pristine and OH\* self-modified PM-N<sub>4</sub> sites. (b) The linear relationship between  $\Delta G_{O^*}$  and  $\Delta G_{OH^*}$  for typical pristine and OH\* self-modified PM-N<sub>3</sub>-C sites (black dots represent pristine and OH\* self-modified PM-N<sub>4</sub> sites). The  $\Delta G_{O^*}$  values are almost linearly related to the  $\Delta G_{OH^*}$  values, but the linearity ( $R^2=0.74$ ) is much lower than that of  $\Delta G_{OOH^*}$  ( $R^2=0.99$ ).

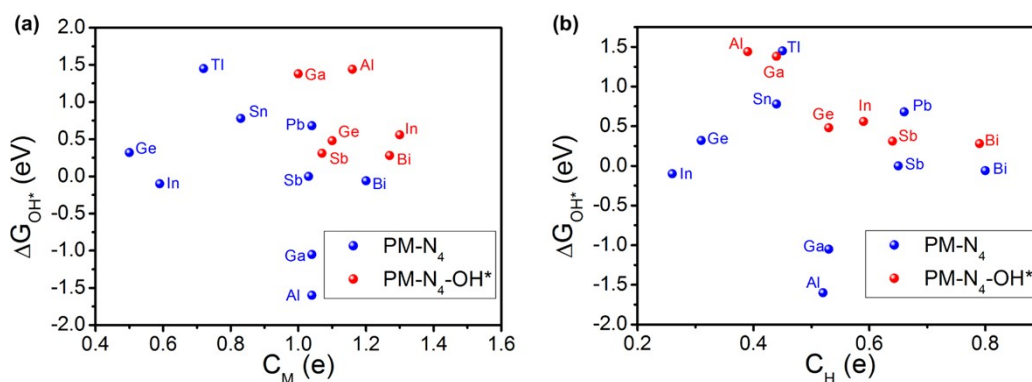

**Fig. S14.** (a) Mulliken charge ( $C_M$ ) and (b) Hershfield charge ( $C_H$ ) of PM atom in PM-N<sub>4</sub> and PM-N<sub>4</sub>-OH\* sites.

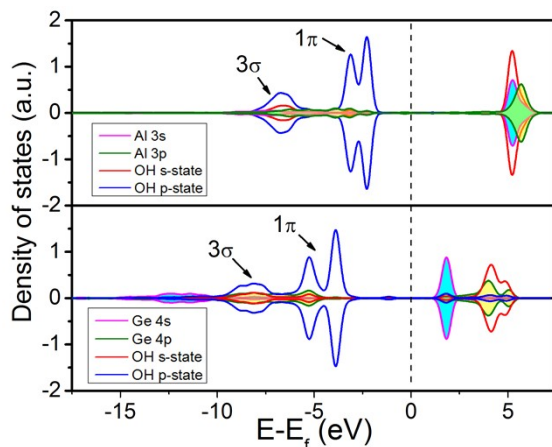

**Fig. S15.** Density of states (DOS) for OH\* adsorbed on Al-N<sub>4</sub> and Ge-N<sub>4</sub>. The s-state and p-state of PM atom are depicted by cyan and yellow, respectively.

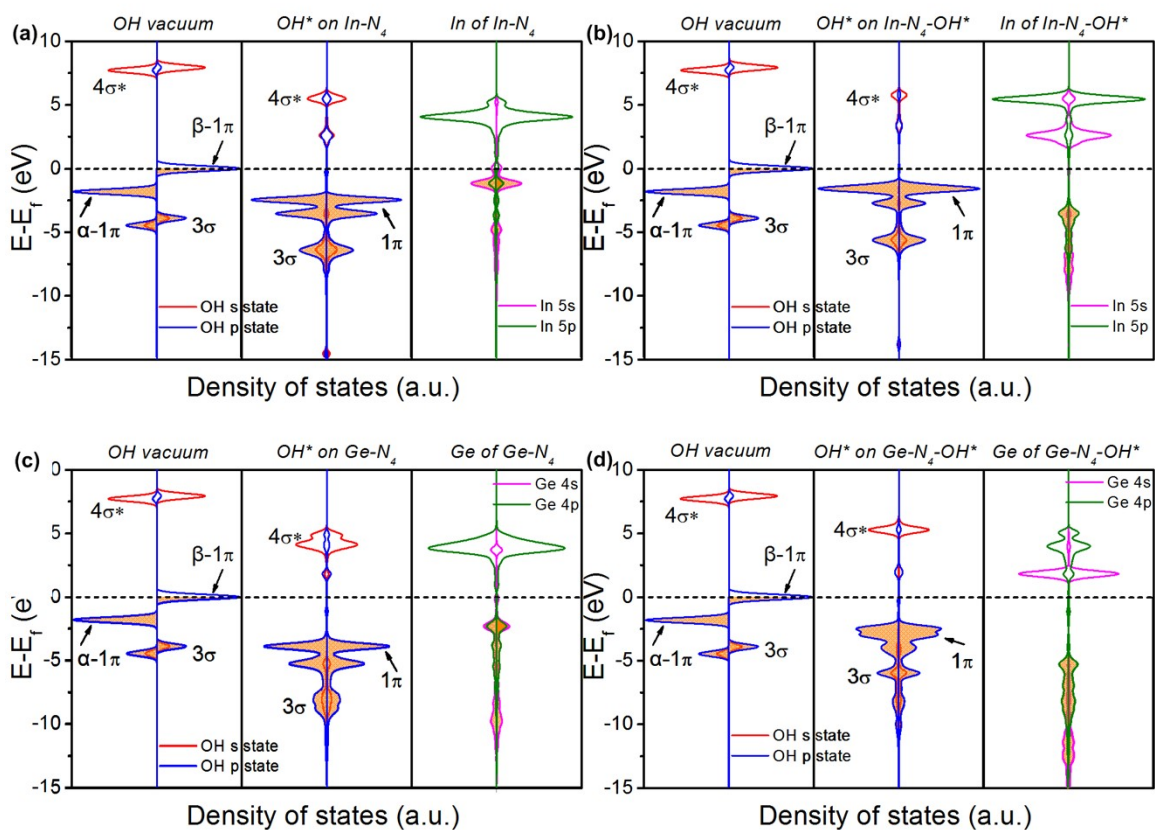

**Fig. S16.** (a) DOS of vacuum OH and adsorbed OH\* on In-N<sub>4</sub> and PDOS of In atom of In-N<sub>4</sub>. (b) DOS of vacuum OH vacuum and OH\* adsorbed on In-N<sub>4</sub>-OH\* and PDOS of In atom of In-N<sub>4</sub>-OH\*. (c) DOS of vacuum OH and adsorbed OH\* on Ge-N<sub>4</sub> and PDOS of Ge atom of Ge-N<sub>4</sub>. (d) DOS of vacuum OH vacuum and OH\* adsorbed on Ge-N<sub>4</sub>-OH\* and PDOS of Ge atom of Ge-N<sub>4</sub>-OH\*.

## Tables

**Table S1.** The binding energies ( $E_b$ ) between Sn and its adjacent N atoms in Sn-N<sub>4</sub> moiety with different orbital cut-off radius (R).

| Cut-off energy (Å) | 4.6    | 4.8    | 5.0    | 5.2    | 5.4    |
|--------------------|--------|--------|--------|--------|--------|
| Energy (eV)        | -4.624 | -4.554 | -4.527 | -4.562 | -4.546 |

**Table S2.** Convergence test for k-point mesh for the binding energies ( $E_b$ ) between Sn and its adjacent N atoms in Sn-N<sub>4</sub> moiety.

| K-point     | 2×2×1  | 3×3×1  | 4×4×1  | 5×5×1  | 6×6×1  | 7×7×1  |
|-------------|--------|--------|--------|--------|--------|--------|
| Energy (eV) | -4.621 | -4.569 | -4.562 | -4.561 | -4.560 | -4.559 |

**Table S3.** Lattice constants (a×b) of PM-N<sub>4</sub> embedded graphene sheets ( $c = 20$  Å,  $\alpha = \beta = 90^\circ$ ,  $\gamma = 120^\circ$ ). All results are in unit of Å<sup>2</sup>.

| Al          | Ga          | In          |
|-------------|-------------|-------------|
| 9.82 × 9.82 | 9.85 × 9.85 | 9.82 × 9.82 |
| Tl          | Ge          | Sn          |
| 9.84 × 9.84 | 9.81 × 9.81 | 9.84 × 9.84 |
| Pb          | Sb          | Bi          |
| 9.84 × 9.84 | 9.82 × 9.82 | 9.84 × 9.84 |



**Table S4.** The bond length of PM-N, the height of PM atom above the substrate ( $h_{PM}$ ), the atomic radii of PM, the binding energy ( $E_b$ ) between PM and its adjacent N atoms in PM-N<sub>4</sub> moieties, and the cohesive energy ( $E_{coh}$ ) of PM atom in bulk p-block metal.

| PM moiety         | PM-N (Å) | $h_{PM}$ (Å) | Atomic radii | $E_b$ (eV) | $E_{coh}$ (eV) |
|-------------------|----------|--------------|--------------|------------|----------------|
| Al-N <sub>4</sub> | 1.89     | 0            | 1.21         | -7.36      | -3.46          |
| Ga-N <sub>4</sub> | 1.93     | 0            | 1.22         | -4.45      | -2.73          |
| In-N <sub>4</sub> | 2.43     | 1.64         | 1.42         | -3.49      | -2.38          |
| Tl-N <sub>4</sub> | 2.73     | 2.04         | 1.45         | -2.94      | -1.84          |
| Ge-N <sub>4</sub> | 2.15     | 1.11         | 1.20         | -5.07      | -3.63          |
| Sn-N <sub>4</sub> | 2.31     | 1.42         | 1.39         | -4.56      | -3.03          |
| Pb-N <sub>4</sub> | 2.45     | 1.67         | 1.46         | -3.70      | -2.60          |
| Sb-N <sub>4</sub> | 2.21     | 1.23         | 1.39         | -2.95      | -2.81          |
| Bi-N <sub>4</sub> | 2.36     | 1.48         | 1.48         | -1.95      | -2.47          |

**Table S5.** Values of  $\Delta G_{OOH^*}$ ,  $\Delta G_{O^*}$  and  $\Delta G_{OH^*}$  on PM-N<sub>4</sub> embedded graphene.

| PM moiety         | $\Delta G_{OOH^*}$ (eV) | $\Delta G_{O^*}$ (eV) | $\Delta G_{OH^*}$ (eV) |
|-------------------|-------------------------|-----------------------|------------------------|
| Al-N <sub>4</sub> | 1.76                    | 0.60                  | -1.60                  |
| Ga-N <sub>4</sub> | 2.22                    | 0.90                  | -1.05                  |
| In-N <sub>4</sub> | 3.16                    | 1.66                  | -0.10                  |
| Tl-N <sub>4</sub> | 4.56                    | 3.89                  | 1.45                   |
| Ge-N <sub>4</sub> | 3.66                    | 1.01                  | 0.32                   |
| Sn-N <sub>4</sub> | 3.88                    | 1.85                  | 0.78                   |
| Pb-N <sub>4</sub> | 3.71                    | 2.88                  | 0.68                   |
| Sb-N <sub>4</sub> | 3.12                    | 1.12                  | 0.00                   |
| Bi-N <sub>4</sub> | 3.10                    | 1.31                  | -0.06                  |

**Table S6.** Reaction free energy of every CPET step and the value of overpotential  $\eta$  for ORR on PM-N<sub>4</sub> sites.

| PM moiety         | $\Delta G_1$ (eV) | $\Delta G_2$ (eV) | $\Delta G_3$ (eV) | $\Delta G_4$ (eV) | $\eta$ (V) |
|-------------------|-------------------|-------------------|-------------------|-------------------|------------|
| Al-N <sub>4</sub> | -3.16             | -1.16             | -2.20             | 1.60              | 2.83       |
| Ga-N <sub>4</sub> | -2.70             | -1.32             | -1.95             | 1.05              | 2.28       |
| In-N <sub>4</sub> | -1.76             | -1.50             | -1.76             | 0.10              | 1.33       |
| Tl-N <sub>4</sub> | -0.36             | -0.67             | -2.44             | -1.45             | 0.87       |
| Ge-N <sub>4</sub> | -1.26             | -2.65             | -0.69             | -0.32             | 0.91       |
| Sn-N <sub>4</sub> | -1.04             | -2.11             | -1.07             | -0.78             | 0.45       |
| Pb-N <sub>4</sub> | -1.21             | -0.83             | -2.20             | -0.68             | 0.55       |
| Sb-N <sub>4</sub> | -1.80             | -2.00             | -1.12             | 0.00              | 1.23       |
| Bi-N <sub>4</sub> | -1.82             | -1.78             | -1.37             | 0.06              | 1.29       |

**Table S7.** Values of  $\Delta G_{OOH^*}$ ,  $\Delta G_{O^*}$  and  $\Delta G_{OH^*}$  on PM-N<sub>4</sub>-OH\* sites.

| PM moiety              | $\Delta G_{OOH^*}$ (eV) | $\Delta G_{O^*}$ (eV) | $\Delta G_{OH^*}$ (eV) |
|------------------------|-------------------------|-----------------------|------------------------|
| Al-N <sub>4</sub> -OH* | 4.67                    | 3.19                  | 1.44                   |
| Ga-N <sub>4</sub> -OH* | 4.48                    | 3.28                  | 1.38                   |
| In-N <sub>4</sub> -OH* | 3.91                    | 2.68                  | 0.56                   |
| Ge-N <sub>4</sub> -OH* | 3.75                    | 2.08                  | 0.48                   |
| Sb-N <sub>4</sub> -OH* | 3.49                    | 1.96                  | 0.31                   |
| Bi-N <sub>4</sub> -OH* | 3.60                    | 2.13                  | 0.28                   |

**Table S8.** Reaction free energy of every CPET step and the value of overpotential  $\eta$  for ORR on PM-N<sub>4</sub>-OH\* sites.

| PM moiety              | $\Delta G_1$ (eV) | $\Delta G_2$ (eV) | $\Delta G_3$ (eV) | $\Delta G_4$ (eV) | $\eta$ (V) |
|------------------------|-------------------|-------------------|-------------------|-------------------|------------|
| Al-N <sub>4</sub> -OH* | -0.25             | -1.48             | -1.75             | -1.44             | 0.98       |
| Ga-N <sub>4</sub> -OH* | -0.44             | -1.20             | -1.90             | -1.38             | 0.79       |
| In-N <sub>4</sub> -OH* | -1.01             | -1.23             | -2.12             | -0.56             | 0.67       |
| Ge-N <sub>4</sub> -OH* | -1.17             | -1.67             | -1.60             | -0.48             | 0.75       |
| Sb-N <sub>4</sub> -OH* | -1.43             | -1.53             | -1.65             | -0.31             | 0.92       |
| Bi-N <sub>4</sub> -OH* | -1.32             | -1.47             | -1.85             | -0.28             | 0.95       |

**Table S9.** Values of  $\Delta G_{OOH^*}$ ,  $\Delta G_{O^*}$  and  $\Delta G_{OH^*}$  on PM (In, Ge, Sn)-N<sub>3</sub>C and corresponding PM-N<sub>3</sub>C-OH\* sites.

| PM moiety               | $\Delta G_{OOH^*}$ (eV) | $\Delta G_{O^*}$ (eV) | $\Delta G_{OH^*}$ (eV) |
|-------------------------|-------------------------|-----------------------|------------------------|
| In-N <sub>3</sub> C     | 2.65                    | 1.52                  | -0.51                  |
| Ge-N <sub>3</sub> C     | 2.80                    | 0.74                  | -0.46                  |
| Sn-N <sub>3</sub> C     | 3.79                    | 1.63                  | 0.50                   |
| In-N <sub>3</sub> C-OH* | 4.04                    | 2.66                  | 0.91                   |
| Ge-N <sub>3</sub> C-OH* | 4.15                    | 2.71                  | 0.91                   |
| Sn-N <sub>3</sub> C-OH* | 3.29                    | 2.15                  | 0.15                   |

**Table S10.** Values of  $\Delta(\Delta G_{\text{OH}^*})$  and  $\Delta G_{\text{OH}^*}$  on PM-N<sub>4</sub> and typical PM-N<sub>3</sub>C sites.

| PM moiety           | $\Delta(\Delta G_{\text{OH}^*})$ (eV) | $\Delta G_{\text{OH}^*}$ (eV) |
|---------------------|---------------------------------------|-------------------------------|
| Al-N <sub>4</sub>   | 3.04                                  | -1.60                         |
| Ga-N <sub>4</sub>   | 2.43                                  | -1.05                         |
| In-N <sub>4</sub>   | 0.66                                  | -0.10                         |
| Ge-N <sub>4</sub>   | 0.16                                  | 0.32                          |
| Sb-N <sub>4</sub>   | 0.31                                  | 0.00                          |
| Bi-N <sub>4</sub>   | 0.34                                  | -0.06                         |
| In-N <sub>3</sub> C | 1.42                                  | -0.51                         |
| Ge-N <sub>3</sub> C | 1.37                                  | -0.46                         |
| Sn-N <sub>3</sub> C | -0.35                                 | 0.50                          |

**Table S11.** Reaction free energy of every CPET step and the value of overpotential  $\eta$  for ORR on typical PM-N<sub>3</sub>C and PM-N<sub>3</sub>C-OH\* sites.

| PM moiety               | $\Delta G_1$ (eV) | $\Delta G_2$ (eV) | $\Delta G_3$ (eV) | $\Delta G_4$ (eV) | $\eta$ (V) |
|-------------------------|-------------------|-------------------|-------------------|-------------------|------------|
| In-N <sub>3</sub> C     | -2.27             | -1.13             | -2.03             | 0.51              | 1.74       |
| Ge-N <sub>3</sub> C     | -2.12             | -2.06             | -1.20             | 0.46              | 1.69       |
| Sn-N <sub>3</sub> C     | -1.13             | -2.16             | -1.13             | -0.50             | 0.73       |
| In-N <sub>3</sub> C-OH* | -0.88             | -1.38             | -1.75             | -0.91             | 0.35       |
| Ge-N <sub>3</sub> C-OH* | -0.77             | -1.44             | -1.80             | -0.91             | 0.46       |
| Sn-N <sub>3</sub> C-OH* | -1.63             | -1.15             | -2.00             | -0.15             | 1.04       |

**Table S12.** The Mulliken charge ( $C_M$ ) and Hershfield charge ( $C_H$ ) of PM atoms, as well as O highest occupied levels ( $O_h$ ) of OH\* on PM atoms in PM-N<sub>4</sub> sites.

| PM moiety         | $C_M$ (e) | $C_H$ (e) | $O_h$ (eV) |
|-------------------|-----------|-----------|------------|
| Al-N <sub>4</sub> | 1.04      | 0.52      | -1.44      |
| Ga-N <sub>4</sub> | 1.04      | 0.53      | -1.36      |
| In-N <sub>4</sub> | 0.59      | 0.26      | -1.63      |
| Tl-N <sub>4</sub> | 0.72      | 0.45      | 0.61       |
| Ge-N <sub>4</sub> | 0.50      | 0.31      | -2.55      |
| Sn-N <sub>4</sub> | 0.83      | 0.44      | -0.37      |
| Pb-N <sub>4</sub> | 1.04      | 0.66      | -0.64      |
| Sb-N <sub>4</sub> | 1.03      | 0.65      | -1.10      |
| Bi-N <sub>4</sub> | 1.20      | 0.80      | -0.99      |

**Table S13.** The Mulliken charge ( $C_M$ ) and Hershfield charge ( $C_H$ ) of PM atoms, as well as O highest occupied levels ( $O_h$ ) of OH\* on PM atoms in PM-N<sub>4</sub>-OH\* sites.

| PM moiety              | $C_M$ (e) | $C_H$ (e) | $O_h$ (eV) |
|------------------------|-----------|-----------|------------|
| Al-N <sub>4</sub> -OH* | 1.16      | 0.39      | -0.41      |
| Ga-N <sub>4</sub> -OH* | 1.00      | 0.44      | -0.5       |
| In-N <sub>4</sub> -OH* | 1.30      | 0.59      | -0.52      |
| Ge-N <sub>4</sub> -OH* | 1.10      | 0.53      | -1.43      |
| Sb-N <sub>4</sub> -OH* | 1.07      | 0.64      | -0.61      |
| Bi-N <sub>4</sub> -OH* | 1.27      | 0.79      | -0.74      |

## References

- 1 J. K. Nørskov, A. Logadottir and L. Lindqvist, *J. Phys. Chem. B*, 2004, **108**, 17886-17892.
- 2 L. Yu, X. Pan, X. Cao, P. Hu and X. Bao, *J. Catal.*, 2011, **282**, 183-190.

- 3 X. M. Zhao, X. Liu, B. Y. Huang, P. Wang and Y. Pei, *J. Mater. Chem. A*, 2019, **7**, 24583-24593.
- 4 B. Delley, *Mol. Simulat.*, 2006, **32**, 117-123.
- 5 H. A. Hansen, V. Viswanathan and J. K. Nørskov, *J. Phys. Chem. C*, 2014, **118**, 6706-6718.
- 6 E. Skúlason, V. Tripkovic, M. E. Bjořrketun, S. Gudmundsdóttir, G. Karlberg, J. Rossmeisl, T. Bligaard, H. Jońsson and J. K. Nørskov, *J. Phys. Chem. C*, 2010, **114**, 18182-18197.
- 7 V. Tripković, E. Skúlason, S. Siahrostami, J. K. Nørskov and J. Rossmeisl, *Electrochim. Acta*, 2010, **55**, 7975-7981.
- 8 X. R. Zhu, J. X. Yan, M. Gu, T. Y. Liu, Y. F. Dai, Y. H. Gu and Y. F. Li, *J. Phys. Chem. Lett.*, 2019, **10**, 7760-7766.
